# Supplementary material for: Identification and Allelopathy of Green Garlic (Allium sativum L.) Volatiles on Scavenging of Cucumber (Cucumis sativus L.) Reactive Oxygen Species
Source: MDPI journal article supplement (doi:10.3390/molecules24183263), 2019-09-07
Supplement: s1 [file s1]

**Table S2.** Total 42 compounds of whole green garlic (in sealed desiccator)

| Compound Name                            | RT (min) | Area% | Molecular Formula | Molecular Weight |
|------------------------------------------|----------|-------|-------------------|------------------|
| 2-Propenylidene cyclobutene              | 4.11     | 0.75  | C7H8              | 92               |
| Hexamethyl cyclotrisiloxane              | 5.17     | 6.82  | C6H18O3Si3        | 222              |
| Butyl cyclooctane                        | 5.74     | 0.71  | C12H24            | 168              |
| 2,3-Dimethyl-heptane                     | 6.19     | 1.88  | C9H20             | 128              |
| 1,1-bis(dodecyloxy)-Hexadecane           | 6.61     | 1.39  | C15H19Cl2N3S      | 343              |
| Nonane                                   | 7.40     | 0.70  | C9H20             | 128              |
| Cis-1-Ethyl-3-methyl-cyclohexane         | 7.59     | 0.70  | C9H18             | 126              |
| Propyl cyclohexane                       | 8.22     | 0.72  | C9H18             | 126              |
| 3,6-Dimethyl-undecane                    | 8.30     | 3.02  | C13H28            | 184              |
| 3-Ethyl-2-methyl-heptane                 | 8.45     | 8.78  | C10H22            | 142              |
| 1,1,2,3-Tetramethyl-cyclohexane          | 8.98     | 0.75  | C10H20            | 140              |
| 1-Methyl-3-(2-methylpropyl)-cyclopentane | 9.39     | 0.98  | C10H20            | 140              |
| Octamethyl cyclotetrasiloxane            | 9.67     | 4.80  | C9H28O3Si4        | 296              |
| 1-Methyl-3-(2-methylpropyl)-cyclopentane | 9.74     | 0.70  | C10H20            | 140              |
| Mesitylene                               | 9.99     | 3.66  | C9H12             | 120              |
| Decyl vinyl ester carbonic acid          | 10.15    | 2.01  | C13H24O3          | 228              |
| 4-Methyl-decane                          | 10.72    | 3.44  | C11H24            | 156              |
| 2-Cyclohexyl-Decane                      | 10.80    | 1.63  | C16H32            | 224              |
| Eicosyl vinyl ester carbonic acid        | 11.15    | 1.12  | C23H44O3          | 368              |
| 1-Ethyl-2,2,6-trimethyl cyclohexane      | 11.32    | 1.40  | C11H22            | 154              |
| 1,2-Dimethyl-cyclooctene,                | 11.69    | 1.53  | C10H18            | 138              |
| Diallyl disulphide                       | 12.27    | 15.30 | C6H10S2           | 146              |
| 3-Tetradecyl ester trichloroacetic acid  | 12.40    | 2.10  | C16H29Cl3O2       | 358              |
| 1-Nonylcycloheptane                      | 12.54    | 0.72  | C16H32            | 224              |
| Phytol                                   | 12.80    | 2.85  | C20H40O           | 296              |
| Melezitose                               | 12.89    | 1.11  | C18H32O16         | 504              |
| 2-Methyl-trans-decalin                   | 12.94    | 1.49  | C11H20            | 152              |
| 2-Isopropylidene-5-methylhex-4-enal      | 13.17    | 1.76  | C10H16O           | 152              |
| Hexadecanethiol                          | 13.46    | 0.89  | C16H34S           | 258              |
| 1-Methyldecahydronaphthalene             | 13.57    | 1.21  | C11H20            | 152              |
| Decamethyl cyclopentasiloxane            | 13.68    | 2.46  | C10H30O5Si5       | 370              |
| Vinyl lauryl ether                       | 14.86    | 3.89  | C14H28O           | 212              |
| 2,6-Dimethyl-undecane                    | 15.62    | 2.15  | C13H28            | 184              |
| 2-Butyl-1,1,3-trimethyl-cyclohexane      | 15.83    | 4.00  | C13H26            | 182              |
| 2,6,10-Trimethyl-tetradecane             | 17.02    | 1.27  | C17H36            | 240              |
| 3,7,11-Trimethyl-1-dodecanol             | 17.14    | 1.55  | C15H32O           | 228              |
| Dodecamethyl cyclohexasiloxane           | 17.70    | 1.47  | C12H36O6Si6       | 444              |
| tert-Hexadecanethiol                     | 19.38    | 0.79  | C16H34S           | 258              |
| 2,6,10-Trimethyl tetradecane             | 25.95    | 1.40  | C17H36            | 240              |
| 9-Hexyl-heptadecane                      | 27.77    | 2.94  | C23H48            | 324              |
| 2,6,10-Trimethyl-tetradecane             | 29.50    | 1.63  | C17H36            | 240              |
| Pentafluoropropionate octatriacontyl     | 31.15    | 1.54  | C41H77F5O2        | 696              |
