# Supplementary material for: Identification and Allelopathy of Green Garlic (Allium sativum L.) Volatiles on Scavenging of Cucumber (Cucumis sativus L.) Reactive Oxygen Species
Source: MDPI journal article supplement (doi:10.3390/molecules24183263), 2019-09-07
Supplement: s1 [file s1]

**Table S1.** Total 17 compounds of green garlic volatile compounds of cutting segments (in sealed desiccator)

| Compound Name                       | RT (min) | Area% | Molecular Formula                                             | Molecular Weight |
|-------------------------------------|----------|-------|---------------------------------------------------------------|------------------|
| Hexamethyl cyclotrisiloxane         | 5.18     | 0.43  | C <sub>6</sub> H <sub>18</sub> O <sub>3</sub> Si <sub>3</sub> | 222              |
| Diallyl sulfide                     | 6.36     | 0.35  | C <sub>6</sub> H <sub>10</sub> S                              | 114              |
| Methyl propenyl disulfide           | 7.87     | 1.53  | C <sub>4</sub> H <sub>8</sub> S <sub>2</sub>                  | 120              |
| 2,6-Dimethyl-undecane               | 8.30     | 0.46  | C <sub>13</sub> H <sub>28</sub>                               | 184              |
| 3-Ethyl-2-methyl-heptane            | 8.46     | 1.77  | C <sub>10</sub> H <sub>22</sub>                               | 142              |
| Octamethyl cyclotetrasiloxane       | 9.69     | 0.45  | C <sub>9</sub> H <sub>28</sub> O <sub>3</sub> Si <sub>4</sub> | 296              |
| 6-Methyl-octadecane                 | 10.16    | 0.67  | C <sub>10</sub> H <sub>23</sub> NO                            | 173              |
| 4-Methyl-decane                     | 10.73    | 1.17  | C <sub>11</sub> H <sub>24</sub>                               | 156              |
| 1-Ethyl-2,2,6-trimethyl cyclohexane | 11.33    | 0.44  | C <sub>11</sub> H <sub>22</sub>                               | 154              |
| 2-Hexyl-1-octanol                   | 12.80    | 0.75  | C <sub>14</sub> H <sub>30</sub> O                             | 214              |
| 2-Methyl-trans-decalin              | 13.19    | 0.47  | C <sub>11</sub> H <sub>20</sub>                               | 152              |
| p-Menthane-1,2,3-triol              | 13.22    | 0.33  | C <sub>10</sub> H <sub>20</sub> O <sub>3</sub>                | 188              |
| 6-Methyl-octadecane                 | 13.47    | 0.34  | C <sub>23</sub> H <sub>44</sub> O <sub>3</sub>                | 368              |
| 1,1-bis(dodecyloxy)-Hexadecane      | 14.87    | 1.57  | C <sub>40</sub> H <sub>82</sub> O <sub>2</sub>                | 594              |
| 2,6-Dimethyl-undecane               | 15.64    | 0.97  | C <sub>13</sub> H <sub>28</sub>                               | 184              |
| 2-Butyl-1,1,3-trimethyl-cyclohexane | 15.84    | 1.32  | C <sub>13</sub> H <sub>26</sub>                               | 182              |
| 3,7,11-Trimethyl-1-dodecanol        | 17.16    | 0.64  | C <sub>15</sub> H <sub>32</sub> O                             | 228              |
